# Supplementary material for: The association between BMI, smoking, drinking and thyroid disease: a cross-sectional study in Wuhan, China
Source: BMC Endocr Disord. 2021 Sep 13;21:184. doi: 10.1186/s12902-021-00852-0 (PMC8436425; doi:10.1186/s12902-021-00852-0)
Supplement: Supplementary file 2 — Additional file 2. [file 12902_2021_852_MOESM2_ESM.xlsx]

## Sheet: Sheet1
Table S2 Associations of thyroid nodules with BMI, smoker and Drinker in subgroups stratified by other variables
Subgroup	N	BMI≥25kg/m²				Smoker				Drinker
		n	OR	95%CI	P value	n	OR	95%CI	P value	n	OR	95%CI	P value
Gendera
Male	78	46	1.86	0.912-3.793	0.088	50	0.94	0.549-1.609	0.821	26	0.616	0.358-1.062	0.081
Female	160	65	0.871	0.521-1.455	0.597	7	0.782	0.321-1.905	0.588	10	0.936	0.434-2.016	0.866
Age(years)b
≤40	54	15	1.045	0.544-2.007	0.895	10	0.779	0.310-1.958	0.595	5	0.638	0.231-1.762	0.386
40-60	111	50	1.218	0.789-1.882	0.373	31	0.879	0.452-1.712	0.705	18	0.508	0.265-0.972	0.041
>60	73	46	2.069	1.149-3.724	0.015	16	1.108	0.478-2.569	0.81	13	1.284	0.576-2.858	0.541
Smokerc							N/A
No	181	77	1.335	0.939-1.900	0.108	0				18	1.163	0.643-2.104	0.618
Yes	57	34	1.497	0.825-2.718	0.184	57				18	0.456	0.240-0.865	0.016
BMI(kg/m²)d
<25	127	0	N/A			23	1.028	0.534-1.979	0.934	13	0.467	0.236-0.925	0.029
≥25	111	111				34	0.867	0.462-1.628	0.657	23	1.127	0.691-2.055	0.695
Drinkere											N/A
No	202	88	1.189	0.853-1.656	0.306	39	1.186	0.713-1.974	0.511	0
Yes	36	23	3.065	1.413-6.648	0.005	18	0.489	0.201-1.191	0.115	36
Abbreviations: BMI body mass index. All the variables were analyzed by multivariate logistic regression: a Adjusted for age, drinker, smoker, BMI. b Adjusted for gender, drinker, smoker, BMI. c Adjusted for gender, age, drinker, BMI. d Adjusted for gender, age, drinker, smoker. e Adjusted for gender, age, BMI, smoker.
